# Supplementary material
Source: PubMed Central journal article supplement (PMC4135701)
Supplement: JB.01780-14_zjb999093297so1.pdf [file JB.01780-14_zjb999093297so1.pdf]

## 1 **Supplemental Information**

### 2 **Supplemental Results**

#### 3 **Manual curation and expansion of Model SEED draft reconstruction iFpraus\_v0.1**

4 The draft reconstruction generated by Model SEED (1), iFpraus\_v0.1, consisted of 820  
5 reactions, 874 metabolites and 598 genes. 649 reactions were blocked and could thus not  
6 carry flux, and 20 non-spontaneous metabolic and transport reactions were not gene-  
7 associated and thus filled in during the auto-completion step of the Model SEED pipeline.

8

#### 9 **Translation of Model SEED identifiers**

10 Model SEED reaction and metabolite identifiers included in the draft reconstruction were  
11 replaced with standardized BiGG (2) nomenclature. As *F. prausnitzii* is not yet included in  
12 the NCBI Gene database, we replaced the Model SEED gene identifiers included in  
13 iFpraus\_v0.1 with the appropriate NCBI Protein identifiers.

14

#### 15 **Biomass objective function**

16 As information on *F. prausnitzii*'s biomass composition is currently mostly unavailable, the  
17 stoichiometric values for vitamins, cofactors, minerals and amino acids included in the  
18 template biomass objective function included in the Model SEED draft reconstruction were  
19 kept. The template biomass function is based on a curation of the biomass objective functions  
20 in 19 published reconstructions (1) and may thus not correspond well to the true biomass  
21 composition of *F. prausnitzii*. Based on the limited available data, fatty acids included in the  
22 biomass objective function were modified and the biomass precursor spermidine was removed  
23 (see below). Once more detailed information on the biomass composition of *F. prausnitzii*  
24 becomes available, the biomass objective function will be modified accordingly.

## 25 **Gap-filling of central pathways**

26 As few reactions as possible were included without any genomic and biochemical support.  
27 Consequently, only 5 non-spontaneous metabolic reactions were included without supporting  
28 evidence. Reactions representing DNA replication, transcription and protein biosynthesis  
29 were removed, as they are considered to be outside the scope of metabolic reconstructions.  
30 This led to the removal of 126 genes.

31

## 32 **Fermentation pathways**

33 While universal pathways such as glycolysis were well-represented in iFpraus\_v0.1, *F.*  
34 *prausnitzii*'s species-specific butyrate production pathways were constructed manually. The  
35 key enzyme for butyrate production is butyryl-CoA: acetate CoA-transferase  
36 (FAEPRAA2165\_01575, assigned reaction ID BTCOAACCOAT). This enzyme consumes  
37 acetate to produce butyrate and acetyl-CoA from butyryl-CoA, thus explaining the growth-  
38 promoting effect of acetate consumption (3). Pyruvate can be either fermented to D-lactate by  
39 D-lactate dehydrogenase (FAEPRAA2165\_01388, BiGG ID: LDH\_D) or to formate by  
40 pyruvate-formate lyase (FAEPRAA2165\_02890 and FAEPRAA2165\_02891, BiGG ID:  
41 PFL), or converted to acetyl-CoA by pyruvate:ferredoxin oxidoreductase  
42 (FAEPRAA2165\_00243, BiGG ID: POR4i). Butyryl-CoA is formed from acetyl-CoA via  
43 acetoacetyl-CoA, 3-hydroxybutyryl-CoA and crotonyl-CoA, yielding reduction equivalents in  
44 the form of NADH (FAEPRAA2165\_01578-01581, BiGG IDs: ACACT1r, HACD1,  
45 ECOAH1, assigned ID BTCOADH). Further energy is conserved through the buildup of a  
46 proton gradient via a membrane-associated NADH: ferredoxin oxidoreductase  
47 (FAEPRAA2165\_02985-02990 and FAEPRAA2165\_02634-02635, assigned ID  
48 FDNADOX\_H) (4). *F. prausnitzii* possesses an extracellular electron shuttle via flavins and  
49 thiols with extracellular oxygen or intracellular fumarate serving as terminal electron

50 acceptors. Riboflavin and either L-cysteine or glutathione are required for this shuttle to be  
51 functional (5). Appropriate reactions (assigned IDs ESHCYS\_FPe, ESHCYS2\_FPe,  
52 ESHGLU\_FPe, ESHGLU\_FPe) were added to iFpraus\_v0.1. The extracellular electron  
53 shuttle from cysteine/ glutathione to oxygen via riboflavin was assumed to be nonenzymatic.  
54 Furthermore, an extracellular flavin reductase (FAEPRAA2165\_00362, assigned ID FLVrx<sub>e</sub>)  
55 was included to enable flux through the shuttle.

56 We then attempted to identify an intracellular electron transport chain in *F. prausnitzii* A2-165 by  
57 searching for genes with sequence similarity to the cytochrome c oxidase of the *Lachnospiraceae*  
58 representative *Roseburia intestinalis* M50/1 (ROI\_15070) in its genome. A BLASTP score of 29.3 and  
59 an e-value of 0.28 were calculated for the closest match, FAEPRAA2165\_00652, which is annotated  
60 as a hypothetical protein. A2-165 thus likely does not possess a cytochrome c oxidase.

61

## 62 **Amino acid metabolism**

63 The draft reconstruction iFpraus\_v0.1 contained complete synthesis pathways for L-threonine,  
64 L-valine, L-leucine, L-isoleucine, L-lysine, L-histidine, L-arginine, glycine, L-proline, L-  
65 glutamate, L-glutamine, L-aspartate, and L-asparagine based on the genome sequence.  
66 Tryptophan biosynthesis is not annotated in the genome and *F. prausnitzii* does not produce  
67 indole (6), and it is thus unlikely that *F. prausnitzii* can synthesize this amino acid. As L-  
68 alanine transaminase is not annotated in the *F. prausnitzii* genome, the reconstruction  
69 currently predicts that L-alanine cannot be formed *de novo*. According to annotation, serine  
70 cannot be synthesized from 3-phosphoglycerate, and by association, L-cysteine synthesis  
71 depends on an external serine and hydrogen sulfide source. L-phenylalanine and L-tyrosine  
72 were initially predicted essential due to chorismate mutase not being present in the  
73 reconstruction. A gene encoding chorismate mutase (FAEPRAA2165\_00020, BiGG ID:

74 CHORM) was later identified and L-phenylalanine and L-tyrosine are thus no longer essential  
75 in the final reconstruction iFpraus\_v1.0.

76

77 The chemically defined medium proposed by iFpraus\_v0.2, CDM1 (Figure 1) contained L-  
78 alanine, L-cysteine, L-methionine, L-serine, L-phenylalanine, L-tyrosine, and L-tryptophan.  
79 No growth was observed unless a mix of 11 additional amino acids was supplemented,  
80 indicating that some of the annotated amino acid biosynthesis pathways may be nonfunctional  
81 or insufficient. Further curation of the model will have to be performed once the amino acid  
82 requirements of the microbe become known.

83

84 The microbe is predicted to synthesize putrescine, but not spermidine, as adenosylmethionine  
85 decarboxylase is not annotated for *F. prausnitzii*. The biomass objective function contained  
86 spermidine. As *F. prausnitzii* grew without spermidine in medium in our *in vitro* experiments,  
87 either the polyamine is not required or a not yet annotated pathway exists for its synthesis.  
88 Assuming that it is nonessential, spermidine was removed from the biomass objective  
89 function.

90

### 91 **Pyrimidine and purine metabolism**

92 Pyrimidine and purine metabolism was mostly accounted for based on genome annotation,  
93 except that iFpraus\_v0.1 was unable to synthesize all trinucleotides from the respective  
94 dinucleotides. GTP synthesis was enabled by including an additional reaction of adenylate  
95 kinase (FAEPRAA2165\_02826, BiGG ID: ADK3). No enzyme performing net synthesis of  
96 UTP and dTTP from the respective dinucleotides could be identified in the *F. prausnitzii*  
97 genome. Thus, it was necessary to include nucleoside-diphosphate kinase (BiGG IDs:  
98 NDPK2, NDPK4) despite the lack of genomic support for the presence of this enzyme.

99

## 100 **Fatty acid metabolism**

101 *F. prausnitzii* belongs to the gram-positive *Clostridium leptum* group, but usually stains gram-  
102 negative (6) and thus may not produce teichoic acid, which was thus not included in the  
103 reconstruction. The microbe does not possess hydroxy fatty acids and the main fatty acids are  
104 saturated and unsaturated up to a length of 18 carbons (7). In the lack of other information  
105 about *F. prausnitzii*'s fatty acid composition, we removed all hydroxy fatty acid synthesis  
106 reactions included in the draft reconstruction (123 in total) and added all fatty acids shown to  
107 be present (7) to the biomass objective function. Hydroxy fatty acids are included in the  
108 template biomass objective function routinely added to every Model SEED draft  
109 reconstruction (1) and are likely not found in every microbe. No genes involved in fatty acid  
110 synthesis were removed.

111

112 Knowledge on *F. prausnitzii*'s cell wall structure is currently lacking. A putative capsular  
113 polysaccharide biosynthesis reaction (assigned ID CPSS\_FP) was formulated based on  
114 *Streptococcus anginosus*, another *Firmicutes* representative, consisting of glucose,  
115 galactofuranose, N-acetylgalactosamine, and L-rhamnose (8). At least seven genes predicted  
116 to be involved in capsular polysaccharide biosynthesis are annotated in *F. prausnitzii* A2-  
117 165's genome (FAEPRAA2165\_00974-00975, FAEPRAA2165\_00979,  
118 FAEPRAA2165\_00986, FAEPRAA2165\_00988, FAEPRAA2165\_02448-02449), suggesting  
119 that a capsular polysaccharide is formed, and were assigned to CPSS\_FP accordingly.

120

## 121 **Vitamin and cofactor metabolism**

122 Based on the genome sequence, the microbe is unable to synthesize biotin, folic acid,  
123 nicotinic acid, pantothenic acid, and riboflavin, and should thus depend on external sources  
124 for these vitamins. A requirement for riboflavin was already demonstrated *in vitro* (9). It is

125 unclear whether *F. prausnitzii* can synthesize cobalamin (vitamin B12), as only 18 of about  
126 30 enzymes necessary for cobalamin biosynthesis (10) are annotated.

127

128 Thiamine biosynthesis was incomplete in iFpraus\_v0.1. We identified the missing genes  
129 manually and thus completed the pathway by including 4-amino-5-hydroxymethyl-2-  
130 methylpyrimidine synthetase (FAEPRAA2165\_00647, BiGG ID: AHMMPS) and  
131 phosphomethylpyrimidine kinase (FAEPRAA2165\_00779, BiGG IDs HMPK1, PMPK). To  
132 enable consumption of thiamine monophosphate, it was necessary to include thiamine  
133 phosphatase (BiGG ID: THMP) for modeling purposes.

134

135 iFpraus\_v0.1 contained a reaction without supporting genomic evidence (3',5'-bisphosphate  
136 nucleotidase, BiGG ID: BPNT) that was added during automated gap-filling. The reaction is  
137 required to consume 3'-phosphoadenylyl sulfate (PAPS), as coenzyme A metabolism in the  
138 reconstruction would otherwise be nonfunctional. BPNT was thus included in the final  
139 reconstruction iFpraus\_v1.0.

140

141 *F. prausnitzii* among other organisms possesses a selenophosphate synthase (11)  
142 (FAEPRAA2165\_01593, BiGG ID: SELNPS) with unknown function. In *Enterococcus*  
143 *faecalis*, selenophosphate is required for the activity of a reversible xanthine dehydrogenase  
144 (12). As *F. prausnitzii* possesses xanthine dehydrogenase (FAEPRAA2165\_01590-01592,  
145 BiGG ID: r0502), a transporter for selenium and a demand reaction for selenophosphate were  
146 putatively included in the reconstruction.

147

148 Pyridoxal, thymidine and orotic acid were included in CDM2 medium, but not in CDM1  
149 medium, which did not enable growth (Figure 1) and thus may be essential. However,

150 iFpraus\_v0.1 was able to synthesize all three compounds. Pyridoxal phosphate could be  
151 synthesized due to a reaction (pyridoxine biosynthesis glutamine amidotransferase, BiGG ID:  
152 PLPS) filled in during the auto-completion step of the Model SEED pipeline. As this enzyme  
153 is not annotated, *F. prausnitzii* A2-165 most likely requires pyridoxal. PLPS was thus  
154 removed and a transporter for pyridoxal (FAEPRAA2165\_02615, BiGG ID: PYDXabc) was  
155 included in the reconstruction.

156

### 157 **Carbon source utilization**

158 Pathways allowing utilization of glucose, fructose and maltose (6, 13) were already accounted  
159 for in the draft reconstruction. Generally, monosaccharides are imported into the cell either  
160 through a phosphotransferase system (PTS) or an ABC transporter. To enable galactose  
161 utilization (13), phosphoglucomutase (FAEPRAA2165\_01951, BiGG ID: PGMUT) was  
162 included.

163

164 A putative inulin degradation (13) pathway (assigned IDs INULINASE, INULINabc) was  
165 formulated based on the inulin utilization mechanism of the *Lachnospiraceae* representative  
166 *Roseburia inulinivorans*. It possesses a gene cluster containing an intracellular  $\beta$ -  
167 fructofuranosidase and an ABC transport system that are induced during growth on inulin.  
168 Inulin is internalized through the ABC system and degraded intracellularly (14). The closest  
169 matches in the *F. prausnitzii* genome to *R. inulinivorans*  $\beta$ -fructofuranosidase  
170 (FAEPRAA2165\_02761, BLASTP score 470) and ABC transport system  
171 (FAEPRAA2165\_02762-02764, BLASTP score 671, 418, and 436 respectively) were  
172 assigned to the pathway accordingly. The  $\beta$ -fructofuranosidase of *R. inulinivorans* is also  
173 effective against short-chain fructooligosaccharides (FOS), e.g., kestose. As *F. prausnitzii*

174 grows on FOS (6), appropriate reactions were formulated (assigned IDs KESTOASE,  
175 KESTOTTRASE, KESTOPTASE, KESTOabc, KESTOTTRabc, KESTOPTabc).

176

177 *F. prausnitzii* is able to ferment cellobiose (13), but does not possess  $\beta$ -glucosidase (6). We  
178 propose that cellobiose is either metabolized by cellobiose kinase (FAEPRAA2165\_03524,  
179 BiGG ID: CELLBK) followed by 6-phospho-beta-glucosidase (FAEPRAA2165\_00425,  
180 FAEPRAA2165\_01165, BiGG ID: BGLA1), or by cellobiose phosphorylase  
181 (FAEPRAA2165\_03089, BiGG ID: CEPA).

182

183 6-phospho-beta-glucosidase generally accepts arbutin and salicin as substrates (15) (BiGG  
184 IDs: 6PHBG, AB6PGH). However, no growth on salicin was observed (Table S1b).  
185 Accordingly, we did not identify a salicin transporter in the *F. prausnitzii* A2-165 genome.

186

187 *F. prausnitzii* A2-165 grows in starch solution (6), and potato starch (13). Two predicted  
188 cytosolic  $\alpha$ -amylases are encoded in its genome (FAEPRAA2165\_03210,  
189 FAEPRAA2165\_02769). We thus constructed a pathway for soluble starch degradation in the  
190 cytosol (assigned IDs AMY1, O16G2).

191

192 Apple pectin, but not citrus pectin is utilized by *F. prausnitzii* (13). We propose that apple  
193 pectin is degraded extracellularly by a predicted extracellular polygalacturonase  
194 (FAEPRAA2165\_02871) and a putative pectinesterase (FAEPRAA2165\_00933) and included  
195 an appropriate reaction (assigned ID PECTIN\_DEGe). The predicted growth rate on pectin as  
196 sole carbon source was higher for *F. prausnitzii* (0.21 hr<sup>-1</sup>) than for the *B. thetaiotaomicron*  
197 reconstruction (30) (0.16 hr<sup>-1</sup> when growth on YCFA medium was simulated), in agreement



198 with the observation that *F. prausnitzii* can compete successfully with *B. thetaiotaomicron*  
199 over this carbon source (11).

200

201 Transporters for the fermentable carbohydrates galacturonate and glucuronate (13) are not  
202 annotated, and proton symport (BiGG ID: GALURt2r, GLCURt2r) was assumed. Uronic acid  
203 degradation is carried out by the subsystem of pentose phosphate pathway/ pentose and  
204 glucuronate interconversions and was already accounted for in iFpraus\_v0.1.

205

206 Amino sugar (glucosamine, N-acetylglucosamine) utilization (13) pathways were already  
207 accounted for in iFpraus\_v0.1. Transport of amino sugars was assumed via  
208 phosphotransferase system (PTS) as *F. prausnitzii* encodes a predicted N-acetylglucosamine-  
209 specific-PTS (FAEPRAA2165\_00107, BiGG ID: GAMpts, ACGApts).

210

211 *F. prausnitzii* utilizes the N-acetylneuraminic acid (Table S1b) via N-Acetylneuraminate lyase  
212 (FAEPRAA2165\_02440, BiGG ID: ACNML), N-acetylmannosamine 6-phosphate epimerase  
213 (FAEPRAA2165\_02442, BiGG ID: AMANAPEr) and N-acetyl-D-mannosamine kinase  
214 (BiGG ID: AMANK, FAEPRAA2165\_02443). Furthermore, we identified a sialic acid  
215 transporter (FAEPRAA2165\_02437) that is colocalized with sialic acid utilization genes and is an  
216 ortholog of the SAT3-type transporter Spy\_254 from *Streptococcus pyogenes* M1 GAS. A  
217 corresponding reaction (assigned ID ACNAMabc) was included.

218

219 The pentose moiety of inosine is predicted to be utilized for biomass production via purine-nucleoside  
220 phosphorylase (FAEPRAA2165\_00956, FAEPRAA2165\_01440) and the incomplete pentose  
221 phosphate pathway.

222

223 **Production of known secretion products**

224 The main secretion products of *F. prausnitzii* include butyrate, D-lactate, formate, and CO<sub>2</sub>.  
225 L-lactate and hydrogen are not produced (6). The draft reconstruction was unable to produce  
226 and transport these compounds except CO<sub>2</sub>. Transport reactions for formate, butyrate, and D-  
227 lactate were thus included (BiGG IDs: BUTtr, FORt, D\_LACt2), though no associated genes  
228 could be identified.

229

230 Butyrate is the end product of *F. prausnitzii*'s central fermentation pathway as described  
231 above. Formate is generated by pyruvate formate lyase (FAEPRAA2165\_02890-02891, BiGG  
232 ID: PFL). D-lactate is formed via D-lactate dehydrogenase (BiGG ID: LDH\_D). An  
233 associated gene (FAEPRAA2165\_01388) was identified (Table 3).

234

235 In the presence of fumarate, *F. prausnitzii* produces L-malate and succinate (5). A predicted  
236 C4-dicarboxylate transport cluster (FAEPRAA2165\_01190-01193, BiGG IDs: FUMt,  
237 MAL\_Lte, SUCt) was assumed to transport L-malate, fumarate and succinate.

238 The draft reconstruction contained a quinone-, ferrichrome- and NADH-dependent L-lactate  
239 dehydrogenase. *F. prausnitzii* does not produce L-lactate (6). Genomic analysis revealed that  
240 the associated gene (dehydrogenase, FMN-dependent, FAEPRAA2165\_01935) is  
241 misannotated and more similar to eukaryotic hydroxyacid oxidases (gene name *Hao2*, EC  
242 1.1.3.15). The corresponding reaction (BiGG ID: GLYCTO4) was added and the previously  
243 included reactions (four in total) were removed.

244

### 245 **Remaining blocked reactions in the reconstruction**

246 While iFpraus\_v0.1 contained 68% (618/904) blocked reactions, i.e., reactions including metabolites  
247 that can either be only produced or only consumed, iFpraus\_v0.2 had 23% blocked reactions  
248 (225/997) (Table 1a). The pathways most affected by blocked reactions are cofactor and prosthetic

249 group biosynthesis and glycerophospholipid metabolism. In total, 39 reactions are blocked due to  
250 incompletely annotated pathways for vitamin B12 biosynthesis. In fact, 18 genes were present in the  
251 genome, while about 30 gene products are estimated to be required for vitamin B12 synthesis (25).  
252 Additional blocked reactions were in biotin biosynthesis (six genes present), folate biosynthesis (three  
253 genes present), quinone biosynthesis (two genes present), NAD biosynthesis (one gene present) and  
254 pantothenic acid biosynthesis (one gene present). In glycerophospholipid metabolism, 71 reactions are  
255 blocked, with 60 of them being linked to lysophospholipase L1 (FAEPRAA2165\_02559) or  
256 phospholipase A2 (FAEPRAA2165\_02521), since a phospholipid transporter could not be identified  
257 in the *F. prausnitzii* genome. It is thus unclear if *F. prausnitzii* A2-165 is able to take up and degrade  
258 phospholipids.

259

## 260 **Reconstruction improvement based on experimentally observed metabolite uptake and** 261 **secretion**

262 Metabolite uptake and secretion was determined by mass spectrometry analysis for *F.*  
263 *prausnitzii* A2-165 cultures grown for 24 h. Samples taken at time points 0, 4, 8, 12, 16, 20  
264 and 24h were analyzed. Furthermore, cell numbers were determined with FISH (Figure S1).  
265 Net metabolite uptake and secretion between 0h (medium before inoculation) and 20h was  
266 determined. Changes observed after 20h were not considered, as the culture was in stationary  
267 phase and concentration differences may be due to cell lysis. For all cases of statistically  
268 significant consumption or secretion, appropriate metabolites and reactions were added to the  
269 reconstruction to ensure that the observed metabolite consumption or secretion was captured.  
270 Metabolite uptake and secretion observed in experiment, as well as and metabolites and  
271 reactions included to connect these metabolites to the network are summarized in Table S2.

272

273 For unexpected secreted compounds, appropriate reactions and metabolites were included  
274 (Table S2) though secretion could only be determined qualitatively. For instance, N-acetyl-

275 glutamate is produced by N-acetylglutamate synthase (FAEPRAA2165\_00167, BiGG ID:  
276 ACGS). This enzyme also accepts L-aspartate as substrate (15), resulting in N-acetyl-L-  
277 aspartate (BiGG ID: ACAS), which was also observed to be formed (Table S2). Phenyllactate  
278 is formed from phenylpyruvate by lactate dehydrogenase (encoded by *ldh* gene) in  
279 *Lactobacillus plantarum* (16). Thus, D-lactate dehydrogenase (FAEPRAA2165\_01388)  
280 (Table 4) was putatively assigned to the corresponding reaction (BiGG ID: PLACOR).

281

282 Two metabolites could not be connected to the network and thus currently represent dead  
283 ends in the reconstruction. *F. prausnitzii* was observed to produce p-aminobenzoic acid in  
284 significant amounts (Table S2). However, biosynthesis of this vitamin precursor is not  
285 annotated in the *F. prausnitzii* genome. Similarly, pyridoxamine was significantly consumed  
286 by *F. prausnitzii*, but pyridoxamine 5'-phosphate oxidase is not annotated in its genome. It is  
287 currently unclear if, and how, these cofactors are converted to their active forms by this  
288 species. Finally, hydroxycaproic acid (Table S2) was not yet included in the reconstruction as  
289 its biosynthesis pathway in bacteria is currently unknown.

290

### 291 **Confidence score assignment**

292 A confidence scoring system ranging from 1 to 4 was applied to iFpraus\_v1.0, where 1  
293 indicates that the reaction was included without evidence for modeling purposes only; 2  
294 stands for either genetic annotation or physiological data support; 3 indicates support from  
295 transcriptomic data, and a score of 4 was given when the gene product has been isolated or  
296 characterized by enzyme assay. The confidence score is accumulative, e.g., genetic and  
297 physiological evidence add up to a confidence score of 4. The average confidence level was  
298 2.29, indicating that on average there was at least either genomic or physiological support for  
299 the inclusion of metabolic and transport reactions in the reconstruction.

300

### 301 **Essential genes predicted by the model**

302 We predicted the essentiality of genes included in iFpraus\_v1.0 for growth on glucose  
303 minimal medium (constraints listed in Table S8) and rich medium. Deletion of essential genes  
304 results in a growth rate of zero. On glucose minimal medium, 176 out of 602 genes (29%)  
305 were predicted to be essential. The majority of these genes were involved in the biosynthesis  
306 of biomass precursors, in particular amino acid metabolism (28%) (Figure S2). As expected,  
307 gene essentiality in the *F. prausnitzii* reconstruction was lower in rich medium, as 84 genes  
308 (14%) were predicted to be essential under these conditions.

### 309 **Analysis of shadow prices calculated for the phenotypic phase planes**

310 We performed a Phenotypic Phase Plane Analysis, where glucose was varied against acetate exchange  
311 while maximizing for biomass (see main text). We examined then the shadow prices for different  
312 metabolites for the entire phase plane. Based on the shadow prices, the phase plane can be divided into  
313 six phases (Figure S4a-b). In the first phase, glucose uptake was lowest and the model was carbon  
314 source-limited, as shown by positive shadow prices for glucose, while the shadow price for acetate  
315 was negative, meaning that the enforced acetate uptake reduced the growth rate as resources have to be  
316 allocated to metabolize the consumed acetate. In phase two to five, the shadow price for acetate  
317 became positive and increased substantially once the constraints switched from acetate uptake to  
318 acetate production. Glucose remained growth-limiting in phase two to five (Figure S4a-b). In the sixth  
319 phase, maximal growth rate was achieved. Notably, in phase six, growth was limited by the lack of  
320 e.g., NAD<sup>+</sup>, NADP<sup>+</sup>, FAD, ATP and acetyl-CoA (Figure S4c-g), while acetate, glucose and other  
321 carbon sources, e.g., pectins, had a shadow price of zero (Figure S4h). Further compounds limiting  
322 growth in phase six were identified as ammonia and other nitrogen sources, e.g. adenine, asparagine or  
323 N-acetylglucosamine (Figure S4i-l).

324 Furthermore, growth was limited in all phases by biomass precursors that can be either imported or  
325 synthesized *de novo*, e.g., arginine, histidine, lysine, phenylalanine, thiamin and uracil (Figure S4m-r).

326 Providing these cost-intensive biomass precursors to the simulated diet would thus enhance growth.  
327 For instance, one  $\mu\text{mol}$  of L-arginine costs one  $\mu\text{mol}$  of 2-oxoglutarate, seven  $\mu\text{mol}$  of ATP and four  
328  $\mu\text{mol}$  each of  $\text{NADP}^+$  and  $\text{NH}_4$ , and one  $\mu\text{mol}$  of lysine costs one  $\mu\text{mol}$  each of oxaloacetate and  
329 pyruvate, two  $\mu\text{mol}$  of ATP, four  $\mu\text{mol}$  of  $\text{NADP}^+$  and two  $\mu\text{mol}$  of  $\text{NH}_4$  (35). All of the required  
330 resources are growth-limiting in phase six (Figure S4m,o) and it would be beneficial for *F. prausnitzii*  
331 to take up readily available biosynthesis products. In agreement with this prediction, we observed a  
332 statistically significant uptake of arginine, histidine, lysine, phenylalanine, thiamin and uracil from  
333 CDM2 medium *in vitro* (Table S2). Building blocks of cell envelope biosynthesis, e.g. UDP-glucose,  
334 UDP-N-acetylglucosamine and UDP-N-acetylmuramic acid, also had positive shadow prices in phase  
335 six (Figure S4s-u). One  $\mu\text{mol}$  each of ATP and glucose-6-phosphate are required to make one  $\mu\text{mol}$  of  
336 UDP-glucose. The costs for UDP-N-acetylglucosamine and UDP-N-acetylmuramic acid are higher  
337 (one  $\mu\text{mol}$  each of fructose-6-phosphate, acetyl-CoA,  $\text{NH}_4$  and three  $\mu\text{mol}$  of ATP for the former and  
338 one  $\mu\text{mol}$  each of fructose-6-phosphate, phosphoenolpyruvate, acetyl-CoA,  $\text{NADP}^+$  and  $\text{NH}_4$  and four  
339  $\mu\text{mol}$  of ATP for the latter) (35). In agreement with these facts, the maximal shadow prices for UDP-  
340 N-glucosamine and UDP-N-acetylmuramic acid were higher (0.51 and 0.58) than for UDP-glucose  
341 (0.34) (Figure S4s-u).

342 Negative shadow prices were computed for metabolites involved in fatty acid metabolism (Figure  
343 S4v-w). Investing more resources than necessary in fatty acid biosynthesis is thus disadvantageous.  
344 Interestingly, some metabolites switched from positive to negative shadow prices in the different  
345 phases. For example, hexadecanoic acid had a positive shadow price in phase one to four, but a  
346 negative shadow price in phase five. Its production cost per  $\mu\text{mol}$  is eight  $\mu\text{mol}$  of acetyl-CoA, seven  
347  $\mu\text{mol}$  of ATP and 14  $\mu\text{mol}$  of  $\text{NADP}^+$  (35). In phase one to four, saving these costs would thus be  
348 beneficial for *F. prausnitzii*, while in phase five, the metabolite would be in excess and costly to  
349 remove. Furthermore, N-2-acetyl-L-ornithine, a precursor of arginine, had a positive shadow price in  
350 phase six (optimal growth), but a negative shadow price in phase two to four (Figure S4x). During  
351 optimal growth, the model would thus benefit from increased availability of arginine precursors, while  
352 at suboptimal growth, the removal of excess N-2-acetyl-L-ornithine would consume resources.

## Supplemental Figures

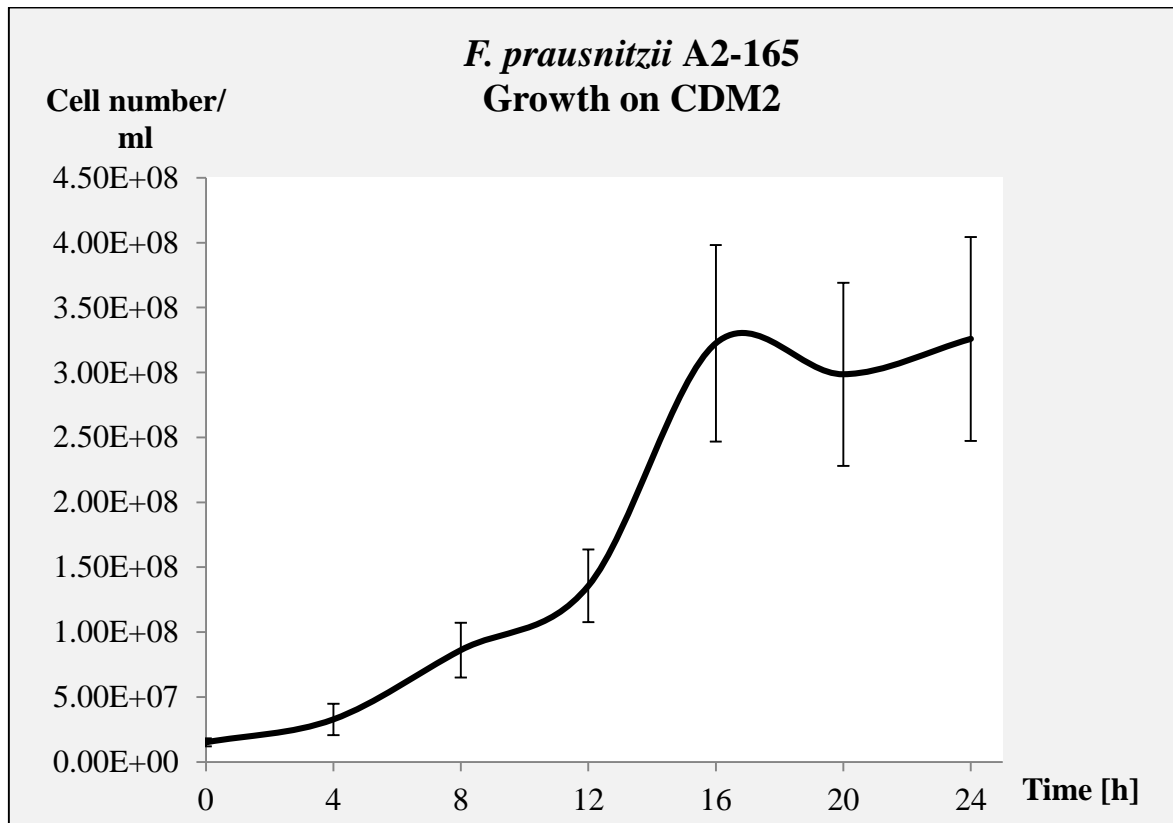

**Figure S1:** *F. prausnitzii* growth on chemically defined medium (CDM2) (composition in Table S10) during 24h. The growth curve represents the average of three biological replicates.

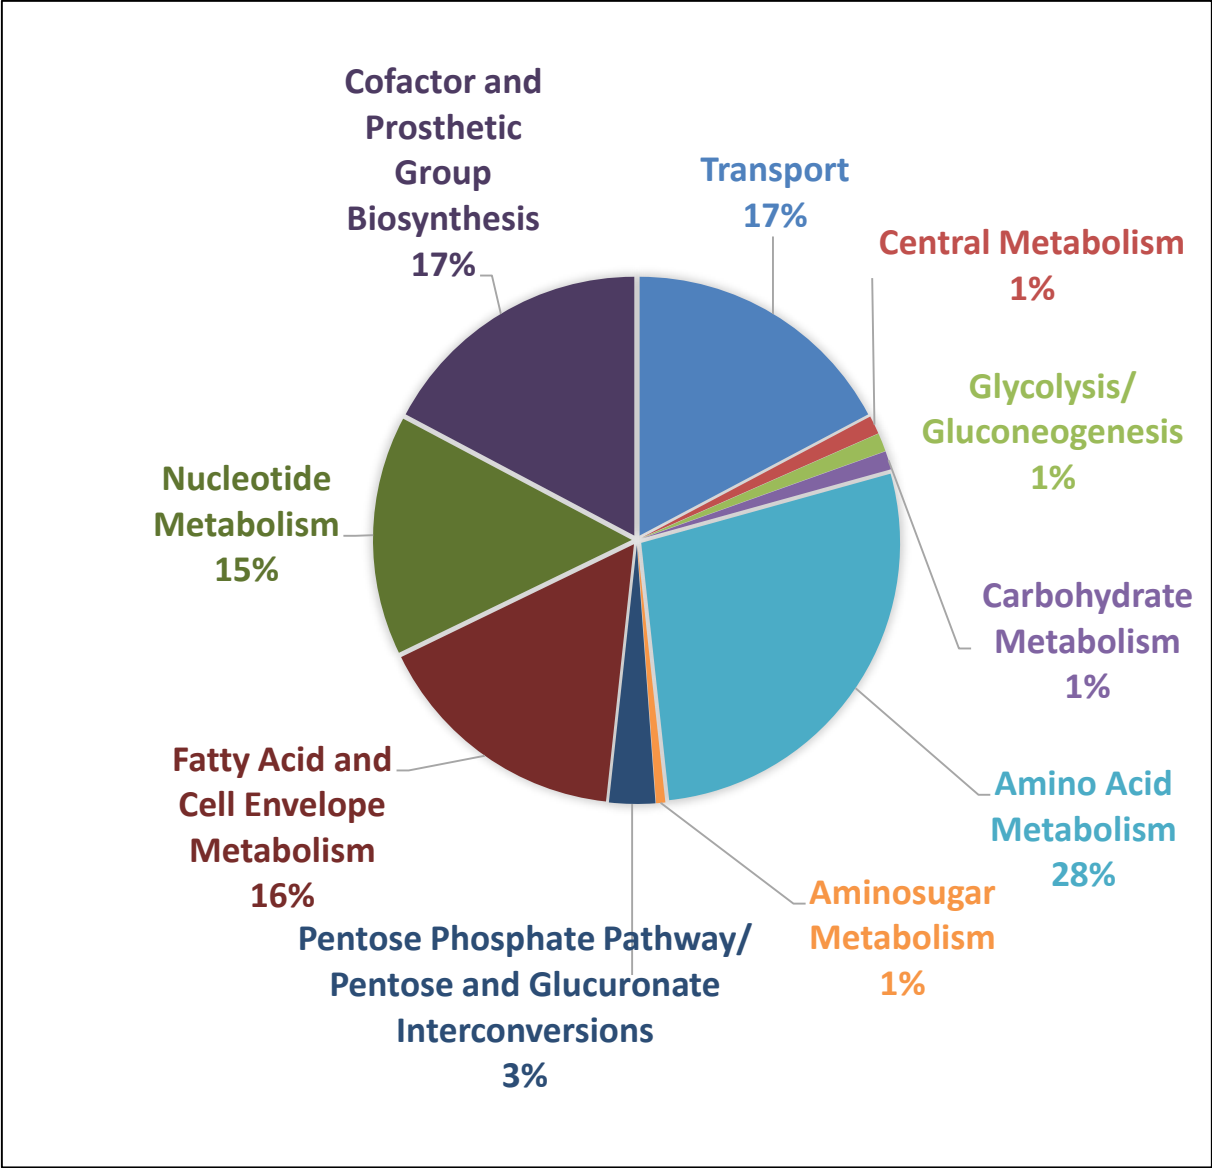

**Figure S2:** Subsystem participation of predicted essential genes for iFpraus\_v1.0 on simulated glucose minimal medium.



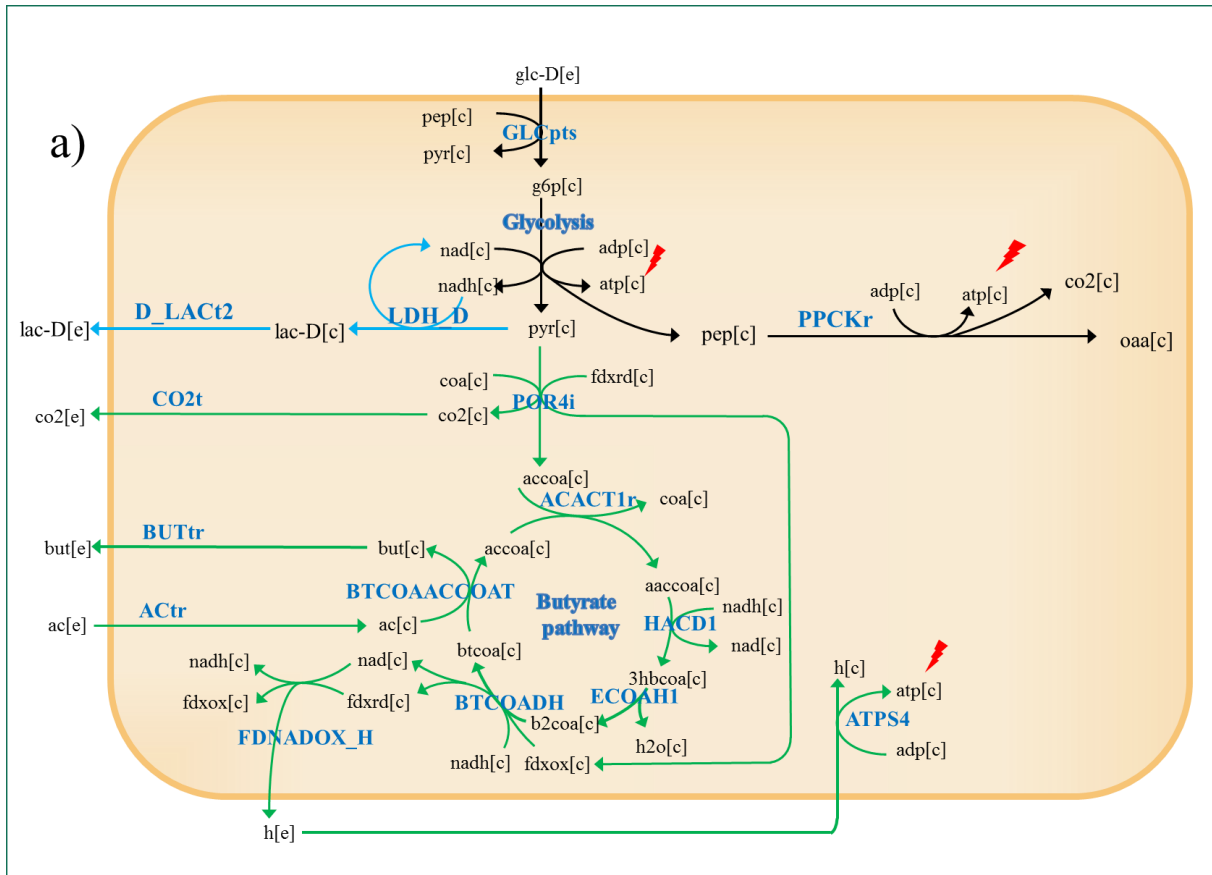

**Figure S3:** Pathway utilization in *F. prausnitzii*'s central metabolism predicted by iFpraus\_v1.0.

a) Optimization for ATP maintenance while consuming glucose with and without acetate supply. Black arrows indicate reactions which carry flux under both conditions, blue arrows indicate reactions only active without acetate supply and green arrow shows reactions that only become active when acetate is provided. The red bolts indicating ATP-generating steps. For simplicity, intracellular protons and correct stoichiometry are not represented in the figure.

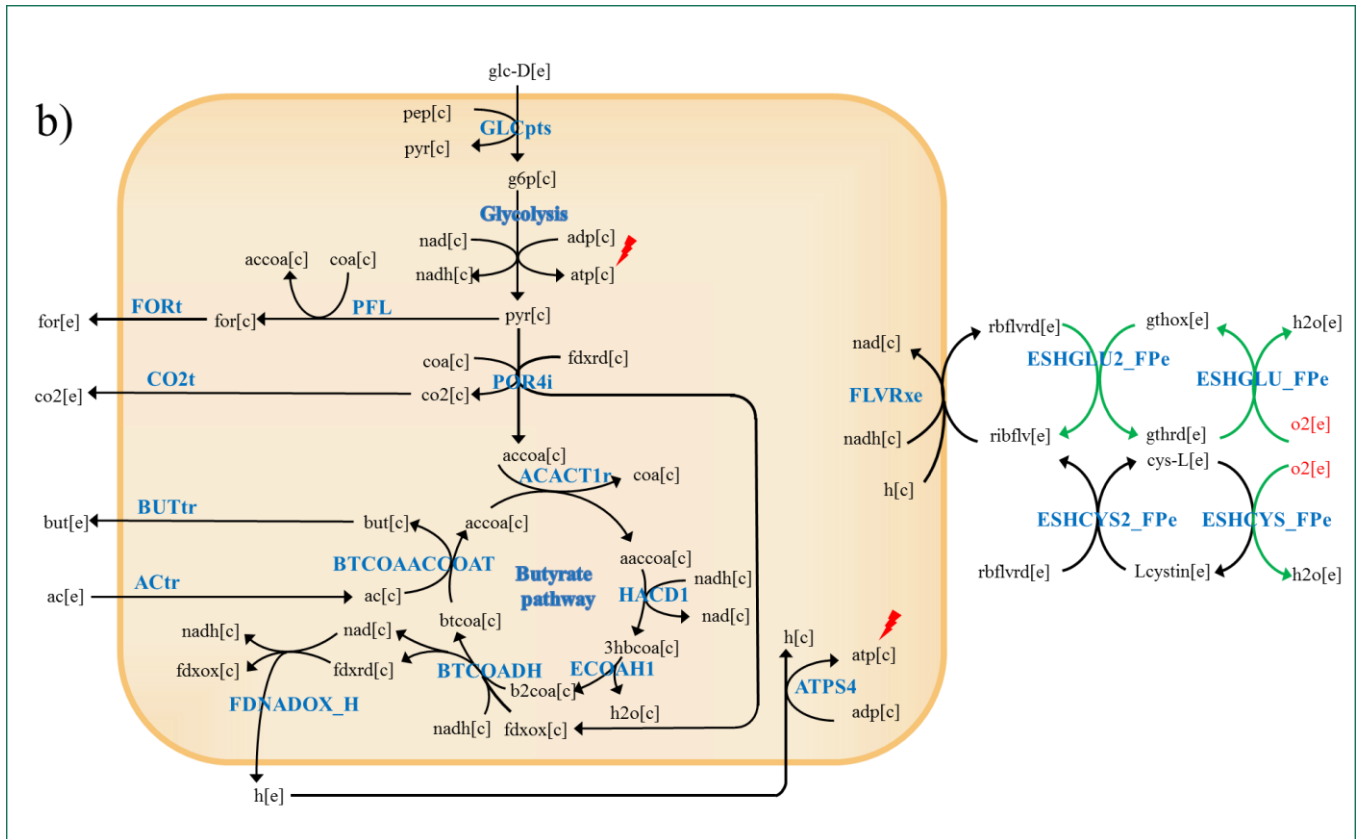

b) Optimization for biomass production on YCFAG medium with a glucose uptake rate of 10 mmol gDw<sup>-1</sup>.hr<sup>-1</sup> (YCFAG10) and YCFAG medium with oxygen added as electron acceptor (YCFAG(O<sub>2</sub>)). Black lines illustrate reactions carrying flux under all three conditions and green arrows indicate reactions only active on YCFAG(O<sub>2</sub>) medium. The red bolts indicating ATP-generating steps. Entrance of oxygen into central metabolism is highlighted in red. For simplicity, intracellular protons and correct stoichiometry are not represented in the figure.

Abbreviations: ACTr = acetate transport, ACOACT1r = acetyl-CoA C-acetyltransferase, ACKr = acetate kinase, ATPS4 = ATP synthase, BTCOAACCOAT = butyryl-CoA:acetate CoA-transferase, BTCOADH = conversion of crotonoyl-CoA to butyryl-CoA by Bcd-Etf complex, BUTr = butyrate transport, CO<sub>2</sub>t = CO<sub>2</sub> transport by diffusion, D\_LACT2 = D-lactate transport, ECOAH1 = 3-hydroxyacyl-CoA dehydratase, ESHCYS\_FPe / ESHCYS2\_FPe = extracellular electron shuttle utilizing cysteine, ESHGLU\_FPe / ESHGLU2\_FPe =

extracellular electron shuttle utilizing glutathione, FDNADOX\_H = ferredoxin:NAD oxidoreductase, FORt = formate transport, GLCpts = D-glucose transport via PEP:Pyr PTS, HACD1 = 3-hydroxyacyl-CoA dehydrogenase (acetoacetyl-CoA), LDH\_D = lactate dehydrogenase, PFL = pyruvate formate lyase, POR4i = pyruvate:ferredoxin oxidoreductase, PPCKr = phosphoenolpyruvate carboxykinase, PTAr = phosphotransacetylase.

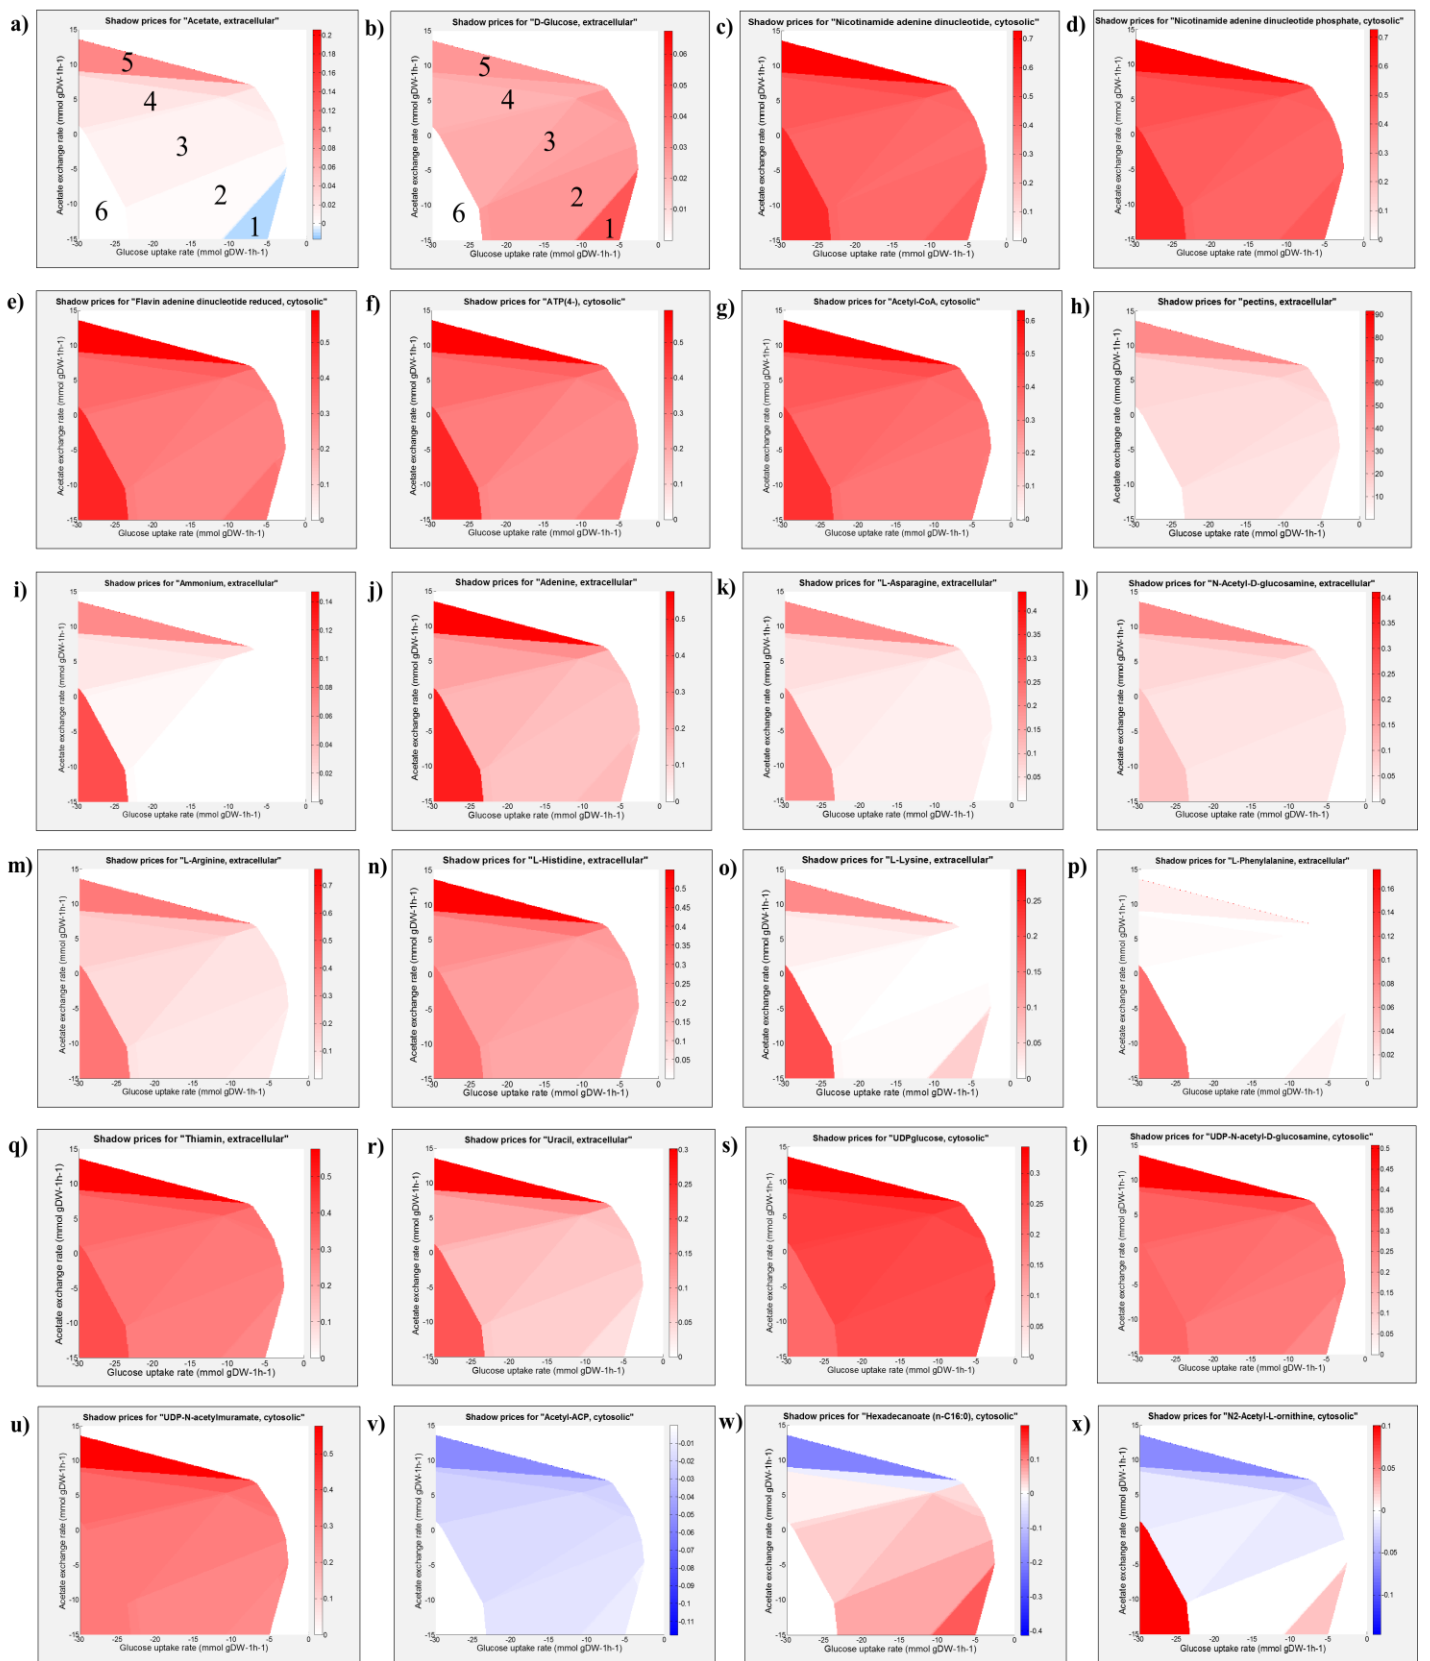

**Figure S4:** Shadow prices computed for a Phenotypic Phase Plane Analysis performed for the *F. prausnitzii* A2-165 reconstruction iFpraus\_v1.0. Glucose and acetate uptake were varied while optimizing biomass production. The shadow prices for 24 metabolites were plotted as heat maps spanning the feasible solution space.

## Supplemental Tables

**Table S1:** Relative growth rates on known carbon sources with glucose as reference determined for iFpraus\_v1.0 *in silico* and for *F. prausnitzii* A2-165 *in vivo* for growth on YCFA medium with carbon sources added one by one, and supporting references.

| <b>Carbon Source</b>                                              | <b><i>In silico</i></b><br><b>Relative growth rate</b> | <b><i>In vivo</i></b><br><b>Relative growth rate</b> |
|-------------------------------------------------------------------|--------------------------------------------------------|------------------------------------------------------|
| Acetate                                                           | No growth                                              | No growth (13)                                       |
| Amino acids                                                       | No growth                                              | No/ little growth (13)                               |
| Arabinogalactan                                                   | No growth                                              | No growth (13)                                       |
| Arabinose                                                         | No growth                                              | No growth (6)                                        |
| Cellobiose                                                        | 1.00                                                   | 1.19 (13)                                            |
| Chondroitin sulfate                                               | No growth                                              | No growth (13)                                       |
| Fructose                                                          | 0.99                                                   | Growth (6) (not determined quantitatively)           |
| Fructooligosaccharides<br>(kestose, kestotetraose, kestopentaose) | 0.89-0.94                                              | Growth (6) (not determined quantitatively)           |
| Fucose                                                            | No growth                                              | No growth (13)                                       |
| Galactose                                                         | 0.55                                                   | 1.51 (13)                                            |
| Galacturonic acid                                                 | 0.77                                                   | 0.40 (13)                                            |

|                     |           |                                                            |
|---------------------|-----------|------------------------------------------------------------|
| Glucosamine         | 1.00      | 1.79 (13)                                                  |
| Glucose             | 1.00      | 1.00 (13)                                                  |
| Glucose + fumarate  | 1.47      | 1.59 (13) (calculated based on Table S1 in this reference) |
| Glucuronic acid     | 0.77      | 1.57 (13)                                                  |
| Heparin             | No growth | No growth (13)                                             |
| Hyaluronic acid     | No growth | No growth (13)                                             |
| Inulin              | 0.99      | 1.51 (13)                                                  |
| D-lactate           | No growth | No growth (17)                                             |
| Maltose             | 0.78      | 1.17 (6)                                                   |
| Melibiose           | No growth | No growth (6)                                              |
| Mucin               | No growth | No growth (13)                                             |
| N-acetylglucosamine | 1.00      | 1.85 (13)                                                  |
| Pectin              | 0.68      | 1.25 (13)                                                  |
| Raffinose           | No growth | No growth (6)                                              |
| Rhamnose            | No growth | No growth (6)                                              |
| Ribose              | No growth | No growth (6)                                              |
| Starch (solution)   | 0.96      | 0.13 (6)                                                   |
| Sucrose             | No growth | No growth (6)                                              |

|           |           |               |
|-----------|-----------|---------------|
| Trehalose | No growth | No growth (6) |
| Xylose    | No growth | No growth (6) |

**Table S2:** Predicted biomass precursor auxotrophy and prototrophy and utilization as nitrogen and sulfur sources for *F. prausnitzii* A2-165. Predicted nitrogen and sulfur sources are highlighted in yellow.

**Table S3:** Comparison of assigned function for all genes included in the reconstruction with NCBI Protein, IMG, BioCyc and The Seed annotations. Genes for which a new annotation is proposed based on comparative genomics analysis are highlighted in yellow.



**Table S4:** Secretion products that may be produced by *F. prausnitzii* A2-165 *in vitro*, and model capabilities to synthesize them before and after curation based on metabolomic measurements.

| Secretion product observed <i>in vitro</i> | Reference      | iFpraus_v0.2 | iFpraus_v1.0 |
|--------------------------------------------|----------------|--------------|--------------|
| Butyric acid                               | (6)            | Capable      | Capable      |
| Formic acid                                | (6)            | Capable      | Capable      |
| D-lactic acid                              | (6)            | Capable      | Capable      |
| Fumaric acid                               | Our study      | Capable      | Capable      |
| Succinic acid                              | (5)            | Capable      | Capable      |
| Malic acid                                 | Our study, (5) | Capable      | Capable      |
| Dihydroorotic acid                         | Our study      | Incapable    | Capable      |
| Glyceric acid                              | Our study      | Incapable    | Capable      |
| Hypoxanthine                               | Our study      | Capable      | Capable      |
| p-aminobenzoic acid                        | Our study      | Incapable    | Incapable    |
| L-aspartic acid                            | Our study      | Capable      | Capable      |
| L-glutamic acid                            | Our study      | Capable      | Capable      |
| L-glutamine                                | Our study      | Capable      | Capable      |
| L-threonine                                | Our study      | Capable      | Capable      |
| 3-Methyl-2-oxovaleric acid                 | Our study      | Incapable    | Capable      |

|                          |                                                 |           |         |
|--------------------------|-------------------------------------------------|-----------|---------|
| Hydroxycaproic acid      | Our study                                       | Incapable | Capable |
| N-Acetyl-L-aspartic acid | Our study                                       | Incapable | Capable |
| N-acetylglutamic acid    | Our study                                       | Incapable | Capable |
| Phenyllactic acid        | Our study, (18)<br>(strains SL3/3 and<br>M21/2) | Incapable | Capable |

**Table S5:** Allowed flux spans of secretion products calculated *in silico* for iFpraus\_v1.0 on anaerobic glucose (YCFAG10) medium and aerobic glucose (YCFAG (O<sub>2</sub>)) medium (modeled after (26)). Fluxes/ concentrations with a negative sign indicate consumption. FVA was computed with 95% satisfaction of objective required.

| <b>Medium</b>                                    | <b>YCFAG10</b>  | <b>YCFAG (O<sub>2</sub>)</b> |
|--------------------------------------------------|-----------------|------------------------------|
| <i>In silico</i> growth rate (hr <sup>-1</sup> ) | 0.31            | 0.39                         |
| <b>Acetate</b>                                   | -15.95 to -7.80 | 9.58 to 16.55                |
| <b>Glucose</b>                                   | -10 to -9.59    | -10 to -9.56                 |
| <b>Fumarate</b>                                  | 0 to 0.35       | 0 to 0.42                    |
| <b>Butyrate</b>                                  | 12.23 to 16.97  | 0 to 3.49                    |
| <b>Formate</b>                                   | 0 to 5.15       | 0 to 2.40                    |
| <b>D-lactate</b>                                 | 0 to 2.58       | 0 to 1.74                    |
| <b>CO<sub>2</sub></b>                            | 15.78 to 21.93  | 17.43 to 22.51               |
| <b>O<sub>2</sub></b>                             | 0               | -18.54 to -10.67             |
| <b>Succinate</b>                                 | 0 to 0.37       | 0 to 0.42                    |
| <b>Malate</b>                                    | 0 to 0.35       | 0 to 0.42                    |

**Table S6:** Relation between flux through flavin reductase (assigned ID FVLRxe) and biomass production predicted by iFpraus\_v1.0.

| <b>Simulation condition</b>                                            | <b>Flux through FLVRxe<br/>(mmol gDw<sup>-1</sup>.hr<sup>-1</sup>)</b> | <b>Growth rate (hr<sup>-1</sup>)</b> |
|------------------------------------------------------------------------|------------------------------------------------------------------------|--------------------------------------|
| YCFAG10 medium                                                         | 2.50                                                                   | 0.31                                 |
| YCFAG(O <sub>2</sub> ) medium                                          | 30.32                                                                  | 0.39                                 |
| YCFAG(O <sub>2</sub> ) medium, flux through FLVRxe constrained to zero | 0                                                                      | 0.30                                 |

**Table S7:** Description of reactions and metabolites included in the final reconstruction iFpraus\_v1.0 in spreadsheet format.

**Table S8:** Simulation constraints for glucose minimal medium. Uptake of metabolites at a certain rate is allowed by constraining the lower bound of the respective exchange reaction to the corresponding negative value. For nutrients which are not provided in the simulated medium, the lower bound of exchange reactions is constrained to zero.

| <b>BiGG exchange reaction ID</b> | <b>Metabolite name</b> | <b>Uptake rate</b><br><b>(mmol g<sub>DW</sub><sup>-1</sup>.hr<sup>-1</sup>)</b> |
|----------------------------------|------------------------|---------------------------------------------------------------------------------|
| EX_ac(e)                         | Acetate                | 10                                                                              |
| EX_ala_L(e)                      | L-alanine              | 1                                                                               |
| EX_btn(e)                        | Biotin                 | 0.1                                                                             |
| EX_ca2(e)                        | Calcium                | 0.1                                                                             |
| EX_cbl1(e)                       | Cobalamin              | 0.1                                                                             |
| EX_cl(e)                         | Chloride               | 0.1                                                                             |
| EX_cobalt2(e)                    | Cobalt                 | 0.1                                                                             |
| EX_cu2(e)                        | Copper                 | 0.1                                                                             |
| EX_cys_L(e)                      | L-cysteine             | 1                                                                               |
| EX_fe2(e)                        | Iron (II)              | 0.1                                                                             |
| EX_fe3(e)                        | Iron (III)             | 0.1                                                                             |
| EX_fol(e)                        | Folate                 | 0.1                                                                             |
| EX_glc(e)                        | Glucose                | 10                                                                              |
| EX_k(e)                          | Potassium              | 0.1                                                                             |

|              |              |     |
|--------------|--------------|-----|
| EX_mg2(e)    | Magnesium    | 0.1 |
| EX_met_L(e)  | L-methionine | 1   |
| EX_nac(e)    | Niacin       | 1   |
| EX_nh4(e)    | Ammonia      | 5   |
| EX_pi(e)     | Phosphate    | 5   |
| EX_pnto_R(e) | Panθοthenate | 0.1 |
| EX_pydx(e)   | Pyridoxal    | 0.1 |
| EX_ribflv(e) | Riboflavin   | 0.1 |
| EX_ser_L(e)  | L-serine     | 1   |
| EX_so4(e)    | Sulfate      | 5   |
| EX_trp_L(e)  | L-tryptophan | 1   |

**Table S9:** Simulation constraints for YCFA medium. Yeast extract was assumed to consist of all metabolites included in the yeast reconstruction iMM904 (19) that could also be transported by iFpraus\_v1.0iFpraus\_v1.0. Casitone was assumed to consist of all 20 amino acids. Uptake of metabolites at a certain rate is allowed by constraining the lower bound of the respective exchange reaction to the corresponding negative value. For nutrients which are not provided in the simulated medium, the lower bound of exchange reactions is constrained to zero. To simulate YCFAG medium, glucose uptake rate is set to  $-10 \text{ mmol g}_{\text{Dw}}^{-1} \cdot \text{hr}^{-1}$ .

| <b>BiGG exchange reaction ID</b> | <b>Metabolite name</b> | <b>Uptake rate</b><br><b>(mmol g<sub>Dw</sub><sup>-1</sup>·hr<sup>-1</sup>)</b> |
|----------------------------------|------------------------|---------------------------------------------------------------------------------|
| EX_ac(e)                         | Acetate                | 33                                                                              |
| EX_ade(e)                        | Adenine                | 1                                                                               |
| EX_ala_L(e)                      | L-alanine              | 1                                                                               |
| EX_arg_L(e)                      | L-arginine             | 1                                                                               |
| EX_asn_L(e)                      | L-asparagine           | 1                                                                               |
| EX_asp_L(e)                      | L-aspartate            | 1                                                                               |
| EX_btn(e)                        | Biotin                 | 1                                                                               |
| EX_ca2(e)                        | Calcium                | 1                                                                               |
| EX_cbl1(e)                       | Cobalamin              | 1                                                                               |
| EX_cl(e)                         | Chloride               | 1                                                                               |
| EX_cobalt2(e)                    | Cobalt                 | 1                                                                               |



|               |              |   |
|---------------|--------------|---|
| EX_cu2(e)     | Copper       | 1 |
| EX_cys_L(e)   | L-cysteine   | 1 |
| EX_fe2(e)     | Iron (II)    | 1 |
| EX_fe3(e)     | Iron (III)   | 1 |
| EX_fol(e)     | Folate       | 1 |
| EX_gln_L(e)   | L-glutamine  | 1 |
| EX_glu_L(e)   | L-glutamate  | 1 |
| EX_gly(e)     | Glycine      | 1 |
| EX_h2s(e)     | Sulfide      | 1 |
| EX_his_L(e)   | L-histidine  | 1 |
| EX_ile_L(e)   | L-isoleucine | 1 |
| EX_k(e)       | Potassium    | 1 |
| EX_Lcystin(e) | L-cystine    | 1 |
| EX_leu_L(e)   | L-leucine    | 1 |
| EX_lys_L(e)   | L-lysine     | 1 |
| EX_met_L(e)   | L-methionine | 1 |
| EX_mg2(e)     | Magnesium    | 1 |
| EX_na1(e)     | Sodium       | 1 |
| EX_nac(e)     | Niacin       | 1 |

|              |                 |    |
|--------------|-----------------|----|
| EX_nh4(e)    | Ammonia         | 1  |
| EX_phe_L(e)  | L-phenylalanine | 1  |
| EX_pi(e)     | Phosphate       | 1  |
| EX_pnto_R(e) | Panθοthenate    | 1  |
| EX_pro_L(e)  | L-proline       | 1  |
| EX_ppa(e)    | Propionate      | 10 |
| EX_pydx(e)   | Pyridoxal       | 1  |
| EX_ribflv(e) | Riboflavin      | 1  |
| EX_ser_L(e)  | L-serine        | 1  |
| EX_so4(e)    | Sulfate         | 1  |
| EX_thm(e)    | Thiamin         | 1  |
| EX_thr_L(e)  | L-threonine     | 1  |
| EX_trp_L(e)  | L-tryptophan    | 1  |
| EX_tyr_L(e)  | L-tyrosine      | 1  |
| EX_ura(e)    | Uracil          | 1  |
| EX_val_L(e)  | L-valine        | 1  |
| EX_xan(e)    | Xanthine        | 1  |

**Table S10:** Simulation constraints for CDM2 (expanded minimal medium). Uptake of metabolites at a certain rate is allowed by constraining the lower bound of the respective exchange reaction to the corresponding negative value. For nutrients which are not provided in the simulated medium, the lower bound of exchange reactions is constrained to zero.

| <b>BiGG exchange reaction ID</b> | <b>Metabolite name</b> | <b>Uptake rate</b><br><b>(mmol g<sub>DW</sub><sup>-1</sup>.hr<sup>-1</sup>)</b> |
|----------------------------------|------------------------|---------------------------------------------------------------------------------|
| EX_ac(e)                         | Acetate                | 33                                                                              |
| EX_ade(e)                        | Adenine                | 1                                                                               |
| EX_ala_L(e)                      | L-alanine              | 1                                                                               |
| EX_arg_L(e)                      | L-arginine             | 1                                                                               |
| EX_asn_L(e)                      | L-asparagine           | 1                                                                               |
| EX_asp_L(e)                      | L-aspartate            | 1                                                                               |
| EX_btn(e)                        | Biotin                 | 1                                                                               |
| EX_ca2(e)                        | Calcium                | 1                                                                               |
| EX_cbl1(e)                       | Cobalamin              | 1                                                                               |
| EX_cl(e)                         | Chloride               | 1                                                                               |
| EX_cobalt2(e)                    | Cobalt                 | 1                                                                               |
| EX_cu2(e)                        | Copper                 | 1                                                                               |
| EX_cys_L(e)                      | L-cysteine             | 1                                                                               |
| EX_fe2(e)                        | Iron (II)              | 1                                                                               |

|              |                 |   |
|--------------|-----------------|---|
| EX_fe3(e)    | Iron (III)      | 1 |
| EX_fol(e)    | Folate          | 1 |
| EX_gln_L(e)  | L-glutamine     | 1 |
| EX_glu_L(e)  | L-glutamate     | 1 |
| EX_gly(e)    | Glycine         | 1 |
| EX_his_L(e)  | L-histidine     | 1 |
| EX_ile_L(e)  | L-isoleucine    | 1 |
| EX_k(e)      | Potassium       | 1 |
| EX_leu_L(e)  | L-leucine       | 1 |
| EX_lys_L(e)  | L-lysine        | 1 |
| EX_met_L(e)  | L-methionine    | 1 |
| EX_mg2(e)    | Magnesium       | 1 |
| EX_na1(e)    | Sodium          | 1 |
| EX_nac(e)    | Niacin          | 1 |
| EX_ncam(e)   | Nicotinic acid  | 1 |
| EX_nh4(e)    | Ammonia         | 1 |
| EX_phe_L(e)  | L-phenylalanine | 1 |
| EX_pi(e)     | Phosphate       | 1 |
| EX_pnto_R(e) | Panthenate      | 1 |

|              |              |   |
|--------------|--------------|---|
| EX_pro_L(e)  | L-proline    | 1 |
| EX_pydx(e)   | Pyridoxal    | 1 |
| EX_ribflv(e) | Riboflavin   | 1 |
| EX_ser_L(e)  | L-serine     | 1 |
| EX_so4(e)    | Sulfate      | 1 |
| EX_thm(e)    | Thiamin      | 1 |
| EX_thr_L(e)  | L-threonine  | 1 |
| EX_trp_L(e)  | L-tryptophan | 1 |
| EX_tyr_L(e)  | L-tyrosine   | 1 |
| EX_ura(e)    | Uracil       | 1 |
| EX_val_L(e)  | L-valine     | 1 |
| EX_xan(e)    | Xanthine     | 1 |

**Table S11:** Composition of CDM1 (initial minimal medium proposed by the model) per 1 l H<sub>2</sub>O bidest. The medium was sterile filtrated.

| <b>Compound</b>                        | <b>Concentration</b> |
|----------------------------------------|----------------------|
| Glucose                                | 4.5 g/l              |
| NaHCO <sub>3</sub>                     | 4 g/l                |
| NaCl                                   | 0.9 g/l              |
| K <sub>2</sub> HPO <sub>4</sub>        | 0.45 g/l             |
| KH <sub>2</sub> PO <sub>4</sub>        | 0.45 g/l             |
| CaCl <sub>2</sub> * 2 H <sub>2</sub> O | 0.17 g/l             |
| MgSO <sub>4</sub> * 7 H <sub>2</sub> O | 0.09 g/l             |
| MgCl <sub>2</sub>                      | 0.16 g/l             |
| ZnSO <sub>4</sub>                      | 0.004 g/l            |
| CuSO <sub>4</sub>                      | 0.0024 g/l           |
| CoCl <sub>2</sub>                      | 0.0002 g/l           |
| FeSO <sub>4</sub>                      | 0.0056 g/l           |
| MnSO <sub>4</sub>                      | 0.028 g/l            |
| Sodium acetate                         | 2.7 g/l              |
| Resazurin                              | 1 mg/l               |
| Hemin                                  | 10 mg/l              |

|                               |            |
|-------------------------------|------------|
| Cysteine (added to the tubes) | 1 g/l      |
| Biotin                        | 10 µg/l    |
| Cobalamin                     | 10 µg/l    |
| 4-aminobenzoic acid           | 30 µg/l    |
| Folic acid                    | 50 µg/l    |
| Pyridoxamine dihydrochloride  | 150 µg/l   |
| Riboflavin                    | 50 µg/l    |
| Thiamin hydrochloride         | 50 µg/l    |
| Panthothenate                 | 50 µg/l    |
| Nicotinic acid                | 50 µg/l    |
| Nicotinamide                  | 50 µg/l    |
| L-alanine                     | 0.2375 g/l |
| L-methionine                  | 0.125 g/l  |
| L-serine                      | 0.3375 g/l |
| L-tryptophan                  | 0.075 g/l  |

**Table S12:** Composition of CDM2 (expanded chemically defined medium) per 1 l H<sub>2</sub>O bidest. The medium was sterile filtrated.

| <b>Compound</b>                        | <b>Concentration</b> |
|----------------------------------------|----------------------|
| Glucose                                | 4.5 g/l              |
| NaHCO <sub>3</sub>                     | 4 g/l                |
| NaCl                                   | 0.9 g/l              |
| K <sub>2</sub> HPO <sub>4</sub>        | 0.45 g/l             |
| KH <sub>2</sub> PO <sub>4</sub>        | 0.45 g/l             |
| CaCl <sub>2</sub> * 2 H <sub>2</sub> O | 0.17 g/l             |
| MgSO <sub>4</sub> * 7 H <sub>2</sub> O | 0.09 g/l             |
| MgCl <sub>2</sub>                      | 0.16 g/l             |
| ZnSO <sub>4</sub>                      | 0.004 g/l            |
| CuSO <sub>4</sub>                      | 0.0024 g/l           |
| CoCl <sub>2</sub>                      | 0.0002 g/l           |
| FeSO <sub>4</sub>                      | 0.0056 g/l           |
| MnSO <sub>4</sub>                      | 0.028 g/l            |
| Sodium acetate                         | 2.7 g/l              |
| Resazurin                              | 1 mg/l               |
| Hemin                                  | 10 mg/l              |



|                               |            |
|-------------------------------|------------|
| Cysteine (added to the tubes) | 1 g/l      |
| Biotin                        | 10.01 mg/l |
| Cobalamin                     | 1.01 mg/l  |
| 4-aminobenzoic acid           | 10.03 mg/l |
| Folic acid                    | 1.05 mg/l  |
| Pyridoxamine dihydrochloride  | 5.015 mg/l |
| Riboflavin                    | 1.05 mg/l  |
| Thiamin hydrochloride         | 1.05 mg/l  |
| Panθοthenate                  | 1.05 mg/l  |
| Nicotinic acid                | 50 µg/l    |
| Nicotinamide                  | 2.05 mg/l  |
| Orotic acid                   | 5 mg/l     |
| Thymidine                     | 5 mg/l     |
| Pyridoxal-HCl                 | 2 mg/l     |
| L-alanine                     | 0.475 g/l  |
| L-serine                      | 0.675 g/l  |
| L-phenylalanine               | 0.75 g/l   |
| L-tyrosine                    | 0.58 g/l   |
| L-tryptophan                  | 0.15 g/l   |

|                       |            |
|-----------------------|------------|
| L-glutamine           | 0.39 g/l   |
| L-asparagine          | 0.35 g/l   |
| L-arginine            | 0.125 g/l  |
| L-lysine              | 0.4375 g/l |
| L-isoleucine          | 0.2125 g/l |
| L-methionine          | 0.125 g/l  |
| L-threonine           | 0.225 g/l  |
| L-valine              | 0.325 g/l  |
| Glycine               | 0.175 g/l  |
| L-histidine           | 0.15 g/l   |
| L-leucine             | 0.475 g/l  |
| L-proline             | 0.675 g/l  |
| Adenine               | 0.01 g/l   |
| Uracil                | 0.01 g/l   |
| Xanthine              | 0.01 g/l   |
| Guanine hydrochloride | 0.01 g/l   |

**Table S13:** Composition of CDM3 (curated chemically defined medium) per 1 l H<sub>2</sub>O bidest.

| <b>Compound</b>                            | <b>Concentration</b> |
|--------------------------------------------|----------------------|
| Glucose                                    | 4.5 g/l              |
| NaHCO <sub>3</sub>                         | 4 g/l                |
| NaCl                                       | 0.9 g/l              |
| K <sub>2</sub> HPO <sub>4</sub>            | 0.45 g/l             |
| KH <sub>2</sub> PO <sub>4</sub>            | 0.45 g/l             |
| CaCl <sub>2</sub> * 2 H <sub>2</sub> O     | 0.17 g/l             |
| MgSO <sub>4</sub> * 7 H <sub>2</sub> O     | 0.09 g/l             |
| MgCl <sub>2</sub>                          | 0.16 g/l             |
| ZnSO <sub>4</sub>                          | 0.004 g/l            |
| CuSO <sub>4</sub>                          | 0.0024 g/l           |
| CoCl <sub>2</sub>                          | 0.0002 g/l           |
| FeSO <sub>4</sub>                          | 0.0056 g/l           |
| MnSO <sub>4</sub>                          | 0.028 g/l            |
| Sodium acetate                             | 2.7 g/l              |
| Resazurin                                  | 1 mg/l               |
| Cysteine (added to the tubes) <sup>1</sup> | 1 g/l                |
| Biotin                                     | 10.01 mg/l           |

|                       |            |
|-----------------------|------------|
| Cobalamin             | 1.01 mg/l  |
| Folic acid            | 1.05 mg/l  |
| Riboflavin            | 1.05 mg/l  |
| Thiamin hydrochloride | 1.05 mg/l  |
| Panθοthenate          | 1.05 mg/l  |
| Nicotinic acid        | 50 µg/l    |
| Nicotinamide          | 2.05 mg/l  |
| Thymidine             | 5 mg/l     |
| Pyridoxal-HCl         | 2 mg/l     |
| L-alanine             | 0.475 g/l  |
| L-serine              | 0.675 g/l  |
| L-phenylalanine       | 0.75 g/l   |
| L-tyrosine            | 0.58 g/l   |
| L-tryptophan          | 0.15 g/l   |
| L-arginine            | 0.125 g/l  |
| L-lysine              | 0.4375 g/l |
| L-isoleucine          | 0.2125 g/l |
| L-methionine          | 0.125 g/l  |
| L-histidine           | 0.15 g/l   |

|           |           |
|-----------|-----------|
| L-leucine | 0.475 g/l |
| L-proline | 0.675 g/l |
| L-valine  | 0.325 g/l |
| Adenine   | 0.01 g/l  |
| Xanthine  | 0.01 /l   |

<sup>1</sup>Cysteine was not consumed significantly (Table S2) and thus may be nonessential, but is required as reducing agent in the medium.

## Supplemental References

1. **Henry CS, DeJongh M, Best AA, Frybarger PM, Linsay B, Stevens RL.** 2010. High-throughput generation, optimization and analysis of genome-scale metabolic models. *Nat Biotechnol* **28**:977-982.
2. **Schellenberger J, Park JO, Conrad TM, Palsson BO.** 2010. BiGG: a Biochemical Genetic and Genomic knowledgebase of large scale metabolic reconstructions. *BMC Bioinformatics* **11**:213.
3. **Duncan SH, Barcenilla A, Stewart CS, Pryde SE, Flint HJ.** 2002. Acetate utilization and butyryl coenzyme A (CoA):acetate-CoA transferase in butyrate-producing bacteria from the human large intestine. *Appl Environ Microbiol* **68**:5186-5190.
4. **Louis P, Flint HJ.** 2009. Diversity, metabolism and microbial ecology of butyrate-producing bacteria from the human large intestine. *FEMS Microbiol Lett* **294**:1-8.
5. **Khan MT, Duncan SH, Stams AJ, van Dijk JM, Flint HJ, Harmsen HJ.** 2012. The gut anaerobe *Faecalibacterium prausnitzii* uses an extracellular electron shuttle to grow at oxic-anoxic interphases. *ISME J*.
6. **Duncan SH, Hold GL, Harmsen HJ, Stewart CS, Flint HJ.** 2002. Growth requirements and fermentation products of *Fusobacterium prausnitzii*, and a proposal to reclassify it as *Faecalibacterium prausnitzii* gen. nov., comb. nov. *Int J Syst Evol Microbiol* **52**:2141-2146.
7. **Jantzen E, Hofstad T.** 1981. Fatty acids of *Fusobacterium* species: taxonomic implications. *J Gen Microbiol* **123**:163-171.
8. **Tsunashima H, Miyake K, Motono M, Iijima S.** 2012. Organization of the capsule biosynthesis gene locus of the oral streptococcus *Streptococcus anginosus*. *J Biosci Bioeng* **113**:271-278.
9. **Khan MT, Browne WR, van Dijk JM, Harmsen HJ.** 2012. How Can *Faecalibacterium prausnitzii* Employ Riboflavin for Extracellular Electron Transfer? *Antioxid Redox Signal*.

10. **Moore SJ, Warren MJ.** 2012. The anaerobic biosynthesis of vitamin B12. *Biochemical Society transactions* **40**:581-586.
11. **Zhang Y, Turanov AA, Hatfield DL, Gladyshev VN.** 2008. In silico identification of genes involved in selenium metabolism: evidence for a third selenium utilization trait. *BMC Genomics* **9**:251.
12. **Srivastava M, Mallard C, Barke T, Hancock LE, Self WT.** 2011. A Selenium-Dependent Xanthine Dehydrogenase Triggers Biofilm Proliferation in *Enterococcus faecalis* through Oxidant Production. *J Bacteriol* **193**:1643-1652.
13. **Lopez-Siles M, Khan TM, Duncan SH, Harmsen HJ, Garcia-Gil LJ, Flint HJ.** 2012. Cultured representatives of two major phylogroups of human colonic *Faecalibacterium prausnitzii* can utilize pectin, uronic acids, and host-derived substrates for growth. *Appl Environ Microbiol* **78**:420-428.
14. **Scott KP, Martin JC, Chassard C, Clerget M, Potrykus J, Campbell G, Mayer CD, Young P, Rucklidge G, Ramsay AG, Flint HJ.** 2011. Substrate-driven gene expression in *Roseburia inulinivorans*: importance of inducible enzymes in the utilization of inulin and starch. *Proc Natl Acad Sci U S A* **108 Suppl 1**:4672-4679.
15. **Kanehisa M, Araki M, Goto S, Hattori M, Hirakawa M, Itoh M, Katayama T, Kawashima S, Okuda S, Tokimatsu T, Yamanishi Y.** 2008. KEGG for linking genomes to life and the environment. *Nucleic acids research* **36**:D480-484.
16. **Jia J, Mu W, Zhang T, Jiang B.** 2010. Bioconversion of phenylpyruvate to phenyllactate: gene cloning, expression, and enzymatic characterization of D- and L1-lactate dehydrogenases from *Lactobacillus plantarum* SK002. *Appl Biochem Biotechnol* **162**:242-251.
17. **Duncan SH, Louis P, Flint HJ.** 2004. Lactate-utilizing bacteria, isolated from human feces, that produce butyrate as a major fermentation product. *Appl Environ Microbiol* **70**:5810-5817.

18. **Russell WR, Duncan SH, Scobbie L, Duncan G, Cantlay L, Calder AG, Anderson SE, Flint HJ.** 2013. Major phenylpropanoid-derived metabolites in the human gut can arise from microbial fermentation of protein. *Molecular nutrition & food research* **57**:523-535.
19. **Mo ML, Palsson BO, Herrgard MJ.** 2009. Connecting extracellular metabolomic measurements to intracellular flux states in yeast. *BMC Syst Biol* **3**:37.
